# Supplementary material
Source: publisher site journal article supplement (https://www.dovepress.com/article/429990)
Supplement: Supplementary file 1 [file get_supplementary_file.php]

**Supplementary Table S1.** Microbial positive detection rates in catheter (n = 1,000) and midstream voided (n = 1,000) urine specimens

| **Both sex Catheter (n = 1,000) and Midstream Voided (n = 1,000)** | | **Criterion B: ≥ 1,000 cells/mL in catheter and ≥ 10,000 cell/mL in midstream voided for bacteria or any detection level for yeast  Positive detection case number (%)** | | |
| --- | --- | --- | --- | --- |
| **Midstream Voided** | **Catheter** | ***p* value** |
| **Overall** | | 819(81.9) | 836(83.6) | 0.31 |
| **Polymicrobial** | | 547(54.7) | 546(54.6) | 0.96 |
| **Monomicrobial** | | 272(27.2) | 290(29.0) | 0.37 |
| **CLASSICAL** | *Escherichia coli* | 368(36.8) | 332(33.2) | 0.09 |
| *Enterococcus faecalis* | 219(21.9) | 291(29.1) | **0.0002** |
| *Klebsiella pneumoniae* | 109(10.9) | 137(13.7) | 0.057 |
| *Proteus mirabilis* | 50(5) | 104(10.4) | **<0.0001** |
| Enterobacter Group | 51(5.1) | 48(4.8) | 0.76 |
| *Pseudomonas aeruginosa* | 46(4.6) | 153(15.3) | **<0.0001** |
| *Klebsiella oxytoca* | 31(3.1) | 32(3.2) | 0.9 |
| *Enterococcus faecium* | 29(2.9) | 27(2.7) | 0.79 |
| *Streptococcus agalactiae* | 29(2.9) | 18(1.8) | 0.1 |
| *Citrobacter freundii* | 18(1.8) | 27(2.7) | 0.17 |
| *Staphylococcus aureus* | 17(1.7) | 52(5.2) | **<0.0001** |
| *Morganella morganii* | 16(1.6) | 32(3.2) | **0.02** |
| *Citrobacter koseri* | 7(0.7) | 4(0.4) | 0.36 |
| *Pantoea agglomerans* | 2(0.2) | 0(0) | 0.16 |
| *Serratia marcescens* | 1(0.1) | 20(2) | **<0.0001** |
| *Providencia stuartii* | 1(0.1) | 11(1.1) | **0.004** |
| **EMERGING** | *Aerococcus urinae* | 328(32.8) | 168(16.8) | **<0.0001** |
| *Actinotignum schaalii* | 319(31.9) | 234(23.4) | <0.0001 |
| *Gardnerella vaginalis* | 54(5.4) | 24(2.4) | **0.0005** |
| *Alloscardovia omnicolens* | 30(3) | 22(2.2) | 0.26 |
| *Corynebacterium riegelii* | 28(2.8) | 8(0.8) | **0.0008** |
| *Ureaplasma urealyticum* | 17(1.7) | 6(0.6) | **0.02** |
| *Mycoplasma hominis* | 7(0.7) | 2(0.2) | 0.09 |
| *Acinetobacter baumannii* | 1(0.1) | 7(0.7) | **0.03** |
|  | Coagulase Negative Staph Group | 65(6.5) | 57(5.7) | 0.45 |
| Viridans Group Strep | 200(20) | 115(11.5) | **<0.0001** |
| **YEASTS** | *Candida albicans* | 27(2.7) | 65(6.5) | **<0.0001** |
| *Candida glabrata* | 20(2) | 29(2.9) | 0.19 |
| *Candida parapsilosis* | 5(0.5) | 11(1.1) | 0.13 |
| *Candida auris* | 0(0) | 0(0) | / |

**Supplementary Table S2.** Microbial positive rates in catheter (n = 621) and matched midstream voided urine (n = 621) specimens in female subjects.

| **Female patients only  Catheter (n = 621) and Midstream Voided (n = 621)** | | **Criterion B: ≥ 1,000 cells/mL in catheter and ≥ 10,000 cell/mL in midstream voided for bacteria or any detection level for yeast  Positive detection case number (%)** | | |
| --- | --- | --- | --- | --- |
| **Midstream Voided** | **Catheter** | ***p* value** |
|  |
| **Overall** | | 543(87.4) | 508(81.8) | **0.006** |  |
| **Polymicrobial infections** | | 407(65.5) | 337(54.3) | **<0.0001** |  |
| **Monomicrobial detections** | | 136(21.9) | 171(27.5) | **0.02** |  |
| **CLASSICAL** | *Escherichia coli* | 278(44.8) | 234(37.7) | **0.01** |  |
| *Enterococcus faecalis* | 131(21.1) | 158(25.4) | 0.07 |  |
| *Klebsiella pneumoniae* | 80(12.9) | 89(14.3) | 0.46 |  |
| *Proteus mirabilis* | 33(5.3) | 73(11.8) | **<0.0001** |  |
| Enterobacter Group | 32(5.2) | 25(4) | 0.34 |  |
| *Enterococcus faecium* | 22(3.5) | 18(2.9) | 0.52 |  |
| *Klebsiella oxytoca* | 21(3.4) | 19(3.1) | 0.75 |  |
| *Streptococcus agalactiae* | 20(3.2) | 15(2.4) | 0.39 |  |
| *Pseudomonas aeruginosa* | 19(3.1) | 63(10.1) | **<0.0001** |  |
| *Citrobacter freundii* | 13(2.1) | 20(3.2) | 0.22 |  |
| *Morganella morganii* | 10(1.6) | 16(2.6) | 0.23 |  |
| *Staphylococcus aureus* | 6(1) | 15(2.4) | **0.048** |  |
| *Citrobacter koseri* | 3(0.5) | 1(0.2) | 0.32 |  |
| *Serratia marcescens* | 1(0.2) | 10(1.6) | **0.006** |  |
| *Pantoea agglomerans* | 1(0.2) | 0(0) | 0.32 |  |
| *Providencia stuartii* | 0(0) | 6(1) | **0.01** |  |
| **EMERGING** | *Aerococcus urinae* | 254(40.9) | 134(21.6) | **<0.0001** |  |
| *Actinotignum schaalii* | 252(40.6) | 174(28) | **<0.0001** |  |
| *Gardnerella vaginalis* | 50(8.1) | 22(3.5) | **0.0007** |  |
| *Alloscardovia omnicolens* | 29(4.7) | 19(3.1) | 0.14 |  |
| *Corynebacterium riegelii* | 22(3.5) | 5(0.8) | **0.0009** |  |
| *Ureaplasma urealyticum* | 13(2.1) | 5(0.8) | 0.06 |  |
| *Mycoplasma hominis* | 7(0.7) | 2(0.2) | 0.09 |  |
| *Acinetobacter baumannii* | 1(0.2) | 4(0.6) | 0.18 |  |
|  | Viridans Group Strep | 176(28.3) | 95(15.3) | **<0.0001** |  |
| Coagulase Negative Staph Group | 31(5) | 17(2.7) | **0.04** |  |
| **YEASTS** | *Candida albicans* | 18(2.9) | 35(5.6) | **0.02** |  |
| *Candida glabrata* | 15(2.4) | 20(3.2) | 0.39 |  |
| *Candida parapsilosis* | 1(0.2) | 2(0.3) | 0.56 |  |
| *Candida auris* | 0(0) | 0(0) | / |  |

**Supplementary Table S3.** Microbial positive rates in catheter (n = 379) and matched midstream voided urine (n = 379) specimens in male subjects.

| **Male patients only  Catheter (n = 379) and Matched Midstream Voided (n = 379)** | | **Criterion B: ≥ 1,000 cells/mL in catheter and ≥ 10,000 cell/mL in midstream voided for bacteria or any detection level for yeast Positive detection case number (%)** | | |
| --- | --- | --- | --- | --- |
|  |
| **Midstream Voided** | **Catheter** | ***p* value** |  |
| **Overall** | | 276(72.8) | 328(86.5) | **<0.0001** |  |
| **polymicrobial infections** | | 140(36.9) | 209(55.1) | **<0.0001** |  |
| **monomicrobial detections** | | 136(35.9) | 119(31.4) | 0.19 |  |
| **CLASSICAL** | *Escherichia coli* | 90(23.7) | 98(25.9) | 0.5 |  |
| *Enterococcus faecalis* | 88(23.2) | 133(35.1) | **0.0003** |  |
| *Klebsiella pneumoniae* | 29(7.7) | 48(12.7) | **0.02** |  |
| *Pseudomonas aeruginosa* | 27(7.1) | 90(23.7) | **<0.0001** |  |
| Enterobacter Group | 19(5) | 23(6.1) | 0.53 |  |
| *Proteus mirabilis* | 17(4.5) | 31(8.2) | **0.04** |  |
| *Staphylococcus aureus* | 11(2.9) | 37(9.8) | **0.0001** |  |
| *Klebsiella oxytoca* | 10(2.6) | 13(3.4) | 0.53 |  |
| *Streptococcus agalactiae* | 9(2.4) | 3(0.8) | 0.08 |  |
| *Enterococcus faecium* | 7(1.8) | 9(2.4) | 0.61 |  |
| *Morganella morganii* | 6(1.6) | 16(4.2) | **0.03** |  |
| *Citrobacter freundii* | 5(1.3) | 7(1.8) | 0.56 |  |
| *Citrobacter koseri* | 4(1.1) | 3(0.8) | 0.7 |  |
| *Providencia stuartii* | 1(0.3) | 5(1.3) | 0.1 |  |
| *Pantoea agglomerans* | 1(0.3) | 0(0) | 0.32 |  |
| *Serratia marcescens* | 0(0) | 10(2.6) | **0.001** |  |
| **EMERGING** | *Aerococcus urinae* | 74(19.5) | 34(9) | **<0.0001** |  |
| *Actinotignum schaalii* | 67(17.7) | 60(15.8) | 0.5 |  |
| *Corynebacterium riegelii* | 6(1.6) | 3(0.8) | 0.31 |  |
| *Gardnerella vaginalis* | 4(1.1) | 2(0.5) | 0.41 |  |
| *Ureaplasma urealyticum* | 4(1.1) | 1(0.3) | 0.18 |  |
| *Alloscardovia omnicolens* | 1(0.3) | 3(0.8) | 0.32 |  |
| *Mycoplasma hominis* | 1(0.3) | 1(0.3) | 1 |  |
| *Acinetobacter baumannii* | 0(0) | 3(0.8) | 0.08 |  |
|  | Coagulase Negative Staph Group | 34(9) | 40(10.6) | 0.46 |  |
| *Viridans Group Strep* | 24(6.3) | 20(5.3) | 0.53 |  |
| **YEASTS** | *Candida albicans* | 9(2.4) | 30(7.9) | **0.0006** |  |
| *Candida glabrata* | 5(1.3) | 9(2.4) | 0.28 |  |
| *Candida parapsilosis* | 4(1.1) | 9(2.4) | 0.16 |  |
| *Candida auris* | 0(0) | 0(0) | / |  |

**Supplementary Table 4.** Microorganisms Targeted by Probes and Primers for the M PCR Assay#

| Microorganism | Bacterial Cell Wall  (gram-negativea or positivea) | Growth  (fastidiousb or non-fastidiousb) | Classification  (classicalc or emergingc) |
| --- | --- | --- | --- |
| *Acinetobacter baumannii** | gram-negative | Non-fastidious | emerging |
| *Actinotignum schaalii* | gram-positive | fastidious | emerging |
| *Aerococcus urinae* | gram-positive | fastidious | emerging |
| *Alloscardovia omnicolens* | gram-positive | fastidious | emerging |
| *Candida albicans* | NA - yeast | NA - yeast | classical |
| *Candida auris* | NA - yeast | NA - yeast | classical |
| *Candida glabrata* | NA - yeast | NA - yeast | classical |
| *Candida parapsilosis* | NA - yeast | NA - yeast | classical |
| *Citrobacter freundii** | gram-negative | Non-fastidious | classical |
| *Citrobacter koseri** | gram-negative | Non-fastidious | classical |
| *Corynebacterium riegelii* | gram-positive | fastidious | emerging |
| *Enterococcus faecalis** | gram-positive | Non-fastidious | classical |
| *Enterococcus faecium* | gram-positive | Non-fastidious**  ** | classical |
| *Escherichia coli** | gram-negative | Non-fastidious | classical |
| *Gardnerella vaginalis* | gram-positive  or gram-negative | fastidious | emerging |
| *Klebsiella oxytoca** | gram-negative | Non-fastidious | classical |
| *Klebsiella pneumoniae** | gram-negative | Non-fastidious | classical |
| *Morganella morganii** | gram-negative | Non-fastidious | classical |
| *Mycoplasma hominis* | NA - no cell wall | fastidious | emerging |
| *Pantoea agglomerans** | gram-negative | Non-fastidious** | emerging |
| *Proteus mirabilis** | gram-negative | Non-fastidious | classical |
| *Providencia stuartii** | gram-negative | Non-fastidious | classical |
| *Pseudomonas Aeruginosa** | gram-negative | Non-fastidious | classical |
| *Serratia marcescens** | gram-negative | Non-fastidious | classical |
| *Staphylococcus aureus** | gram-positive | Non-fastidious | classical |
| *Streptococcus agalactiae** | gram-positive | Non-fastidious | classical |
| *Ureaplasma urealyticum* | NA - No cell wall | fastidious | emerging |
| Coagulase-negative *Staphylococci* (CoNS)* [S*taphylococcus epidermidis, Staphylococcus haemolyticus, Staphylococcus lugdunenesis, Staphylococcus saprophyticus]* | gram-positive | Non-fastidious | emerging |
| Viridans group *Streptococci* (VGS) [S*treptococcus anginosus,* *Streptococcus oralis, Streptococcus pasteuranus]* | gram-positive | Non-fastidious | emerging |
| *Enterobacter* group*  [*Klebsiella aerogenes* (formally known as *Enterobacter aerogenes*), *Enterobacter cloacae*] | gram-negative | Non-fastidious | classical |

*When detected, will be followed up with P-AST

#References for the role of each organisms as pathogens available upon request

agram-positive vs gram-negative: gram-positive = bacteria that give a positive result in the Gram stain test, which uses crystal violet dye to categorize organisms based on the thickness of the peptidoglycan layer of the cell wall; gram-negative = bacteria that give a negative result in the Gram stain test

bfastidious vs non-fastidious: fastidious = microorganism that has complex or particular nutritional requirements; non-fastidious = microorganism with simple growth requirements met by standard urine culture conditions; non-fastidious = microorganism with simple growth requirements met by standard urine culture conditions

cclassical vs emerging: classical = pathogens traditionally associated with UTI; emerging = microorganisms being newly recognized as potential or confirmed uropathogens
